# Supplementary material for: Treating prolonged grief disorder with prolonged grief-specific cognitive behavioral therapy: study protocol for a randomized controlled trial
Source: PubMed Central journal article supplement (PMC5910599; doi:10.1186/s13063-018-2618-3), 2018-04-20
Supplement: 13063_2018_2618_MOESM2_ESM.pdf [file 13063_2018_2618_MOESM2_ESM.pdf]

## **Additional File 2: Erhebungsbogen für anhaltende Trauer (PG13+9) Erweiterte deutsche Forschungsversion des PG-13**

### **Teil 1: Bitte jeweils eine Antwort pro Frage ankreuzen.**

1. Wie oft hatten Sie im letzten Monat Sehnsucht oder starkes Verlangen nach der verstorbenen Person und es ging Ihnen schlecht dabei?
  - Überhaupt nicht (1)
  - Mindestens einmal (2)
  - Mindestens einmal pro Woche (3)
  - Mindestens einmal pro Tag (4)
  - Mehrmals täglich (5)
  
2. Wie oft hatten Sie im letzten Monat intensive Gefühle von Schmerz, Wehmut oder Trauer in Bezug auf die verstorbene Person?
  - Überhaupt nicht (1)
  - Mindestens einmal (2)
  - Mindestens einmal pro Woche (3)
  - Mindestens einmal pro Tag (4)
  - Mehrmals täglich (5)
  
3. Falls die Fragen 1 und 2 mindestens einmal mit 4 oder 5 beantwortet wurden: Dauern diese Erfahrungen seit mindestens sechs Monaten?
  - Nein
  - Ja
  
4. Wie oft im letzten Monat versuchten Sie, die Erinnerung daran, dass die verstorbene Person tatsächlich nicht mehr da ist, von sich zu schieben?
  - Überhaupt nicht (1)
  - Mindestens einmal (2)
  - Mindestens einmal pro Woche (3)
  - Mindestens einmal pro Tag (4)
  - Mehrmals täglich (5)

5. Wie oft im letzten Monat waren Sie bezüglich des Verlustes fassungslos, schockiert oder benommen?

- Überhaupt nicht (1)
- Mindestens einmal (2)
- Mindestens einmal pro Woche (3)
- Mindestens einmal pro Tag (4)
- Mehrmals täglich (5)

**Teil 2: Bitte geben Sie für jede Frage an, wie es Ihnen momentan geht (jeweils eine Antwort ankreuzen).**

6. Fühlen Sie sich ratlos bezüglich Ihrer Rolle im Leben oder als wüssten Sie nicht mehr, wer Sie sind (z.B. als ob ein Teil Ihrer Selbst gestorben wäre)?

- Überhaupt nicht (1)
- Kaum (2)
- Ein wenig (3)
- Ziemlich (4)
- Sehr (5)

7. Fällt es Ihnen schwer, Ihren Verlust zu akzeptieren?

- Überhaupt nicht (1)
- Kaum (2)
- Ein wenig (3)
- Ziemlich (4)
- Sehr (5)

8. Fällt es Ihnen seit Ihrem Verlust schwer, anderen Menschen zu vertrauen?

- Überhaupt nicht (1)
- Kaum (2)
- Ein wenig (3)
- Ziemlich (4)
- Sehr (5)

9. Sind Sie verbittert über Ihren Verlust?

- Überhaupt nicht (1)
- Kaum (2)
- Ein wenig (3)
- Ziemlich (4)
- Sehr (5)

10. Glauben Sie, dass es jetzt schwierig für Sie ist, Ihr Leben weiterzuführen (z.B. neue Freunde zu finden, neue Interessen zu verfolgen)?

- Überhaupt nicht (1)
- Kaum (2)
- Ein wenig (3)
- Ziemlich (4)
- Sehr (5)

11. Fühlen Sie sich wie betäubt seit Ihrem Verlust?

- Überhaupt nicht (1)
- Kaum (2)
- Ein wenig (3)
- Ziemlich (4)
- Sehr (5)

12. Kommt Ihnen Ihr Leben seit Ihrem Verlust unerfüllt, leer oder bedeutungslos vor?

- Überhaupt nicht (1)
- Kaum (2)
- Ein wenig (3)
- Ziemlich (4)
- Sehr (5)

**Teil 3: Bitte eine Antwort ankreuzen.**

13. Haben Sie eine deutliche Einschränkung Ihrer Fähigkeiten im sozialen, beruflichen oder in einem anderen Umfeld (z. B. bei der Bewältigung des Haushalts) bemerkt?

- Nein
- Ja

#### **Teil 4: Bitte eine Antwort ankreuzen.**

14. Sind Sie so in Gedanken bei der verstorbenen Person, dass es Ihnen schwer fällt, die Dinge zu tun, die Sie normalerweise tun?

- Überhaupt nicht (1)
- Mindestens einmal (2)
- Mindestens einmal pro Woche (3)
- Mindestens einmal pro Tag (4)
- Mehrmals täglich (5)

15. Fühlen Sie sich schuldig in Bezug auf den Verlust?

- Überhaupt nicht (1)
- Kaum (2)
- Ein wenig (3)
- Ziemlich (4)
- Sehr (5)

16. Fällt es Ihnen schwer, sich gut an glückliche Momente mit Ihrer verstorbenen Person zu erinnern?

- Überhaupt nicht (1)
- Kaum (2)
- Ein wenig (3)
- Ziemlich (4)
- Sehr (5)

17. Fällt es Ihnen seit dem Verlust schwer, Glück, Zufriedenheit oder Freude zu erleben?

- Überhaupt nicht (1)
- Kaum (2)
- Ein wenig (3)
- Ziemlich (4)
- Sehr (5)

18. Sind Sie wütend über seinen/ihren Tod?

- Überhaupt nicht (1)
- Kaum (2)
- Ein wenig (3)
- Ziemlich (4)
- Sehr (5)

19. Fällt es Ihnen schwer zu glauben, dass er/sie wirklich tot ist?

- Überhaupt nicht (1)
- Kaum (2)
- Ein wenig (3)
- Ziemlich (4)
- Sehr (5)

20. Fühlen Sie sich einsam, seitdem er/sie gestorben ist?

- Überhaupt nicht (1)
- Kaum (2)
- Ein wenig (3)
- Ziemlich (4)
- Sehr (5)

21. Wären Sie am liebsten tot, um bei der verstorbenen Person sein zu können?

- Überhaupt nicht (1)
- Kaum (2)
- Ein wenig (3)
- Ziemlich (4)
- Sehr (5)

22. Äußert sich Ihre Trauer stärker als Sie es von Menschen in Ihrem Umfeld kennen?

- Nein
- Ja
